# Supplementary material for: Global patterns of soil organic carbon dynamics in the 20–100 cm soil profile for different ecosystems: A global meta-analysis
Source: Copernicus journal article supplement (doi:10.5194/essd-2024-100), 2024-07-15
Supplement: Supplementary file 1 [file essd-2024-100-supplement.pdf]

## Supplementary Information for

### **Global patterns of soil organic carbon dynamics in the 20–100 cm soil profile for different ecosystems: A global meta-analysis**

Haiyan Wang<sup>1,2</sup>, Yulong Yin<sup>1, \*</sup>, Tingyao Cai<sup>1</sup>, Xingshuai Tian<sup>1</sup>, Zhong Chen<sup>1</sup>, Kai He<sup>1</sup>, Zihan Wang<sup>1</sup>, Haiqing Gong<sup>1</sup>, Qi Miao<sup>1</sup>, Yingcheng Wang<sup>1</sup>, Yiyan Chu<sup>1</sup>, Qingsong Zhang<sup>1,2, \*</sup>, Minghao Zhuang<sup>1</sup>, Zhenling Cui<sup>1, \*</sup>

<sup>1</sup> State Key Laboratory of Nutrient Use and Management, College of Resources and Environmental Sciences, China Agricultural University, 100193 Beijing, China

<sup>2</sup> Sanya Institute of China Agricultural University, 572025 Sanya, China

\***Corresponding author:** Zhenling Cui. Email: [cuizl@cau.edu.cn](mailto:cuizl@cau.edu.cn)

Yulong Yin. Email: [yinyulong88221@163.com](mailto:yinyulong88221@163.com)

Qingsong Zhang. Email: [zhangqs@cau.edu.cn](mailto:zhangqs@cau.edu.cn)

**Supplementary Information submitted to: Earth System Science Data**

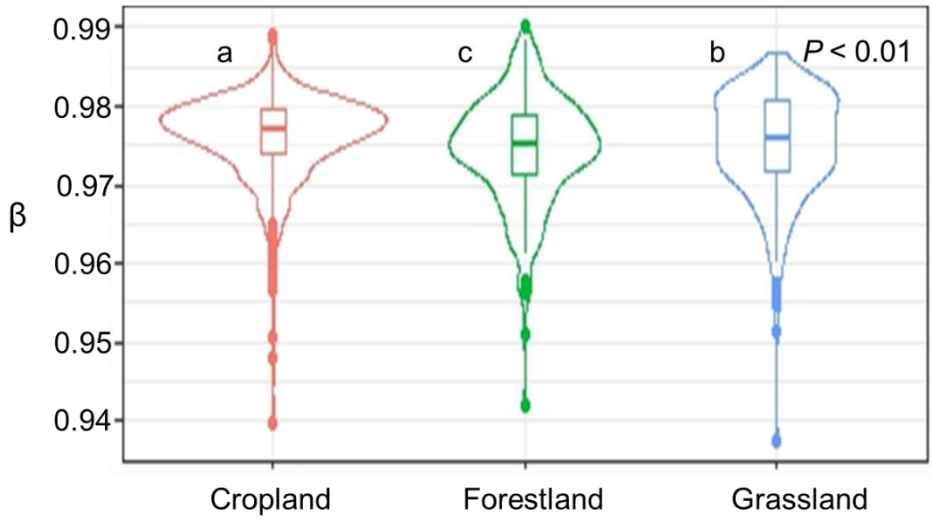

**Figure S1.** Soil  $\beta$  values of the study sites showing significant differences in different ecosystems with ANOVAR analysis and Duncan's new multiple range test.

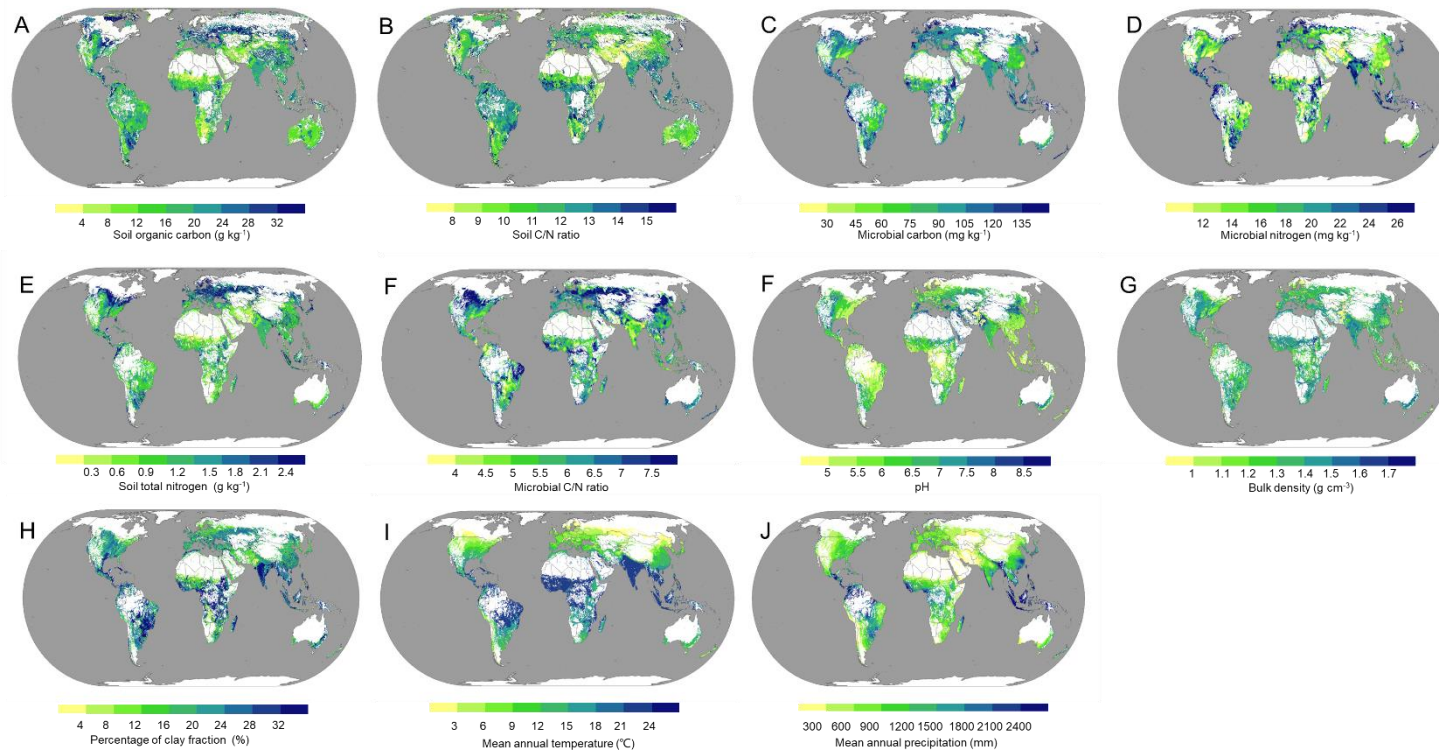

**Fig. S2** Cropland: Global grid-level soil organic carbon (A), soil C/N ratio (B), microbial carbon (C), microbial nitrogen (D), soil total nitrogen (E), microbial C/N ratio (F), pH (G), bulk density (H), percentage of clay fraction (I), mean annual temperature (J), mean annual precipitation (K).

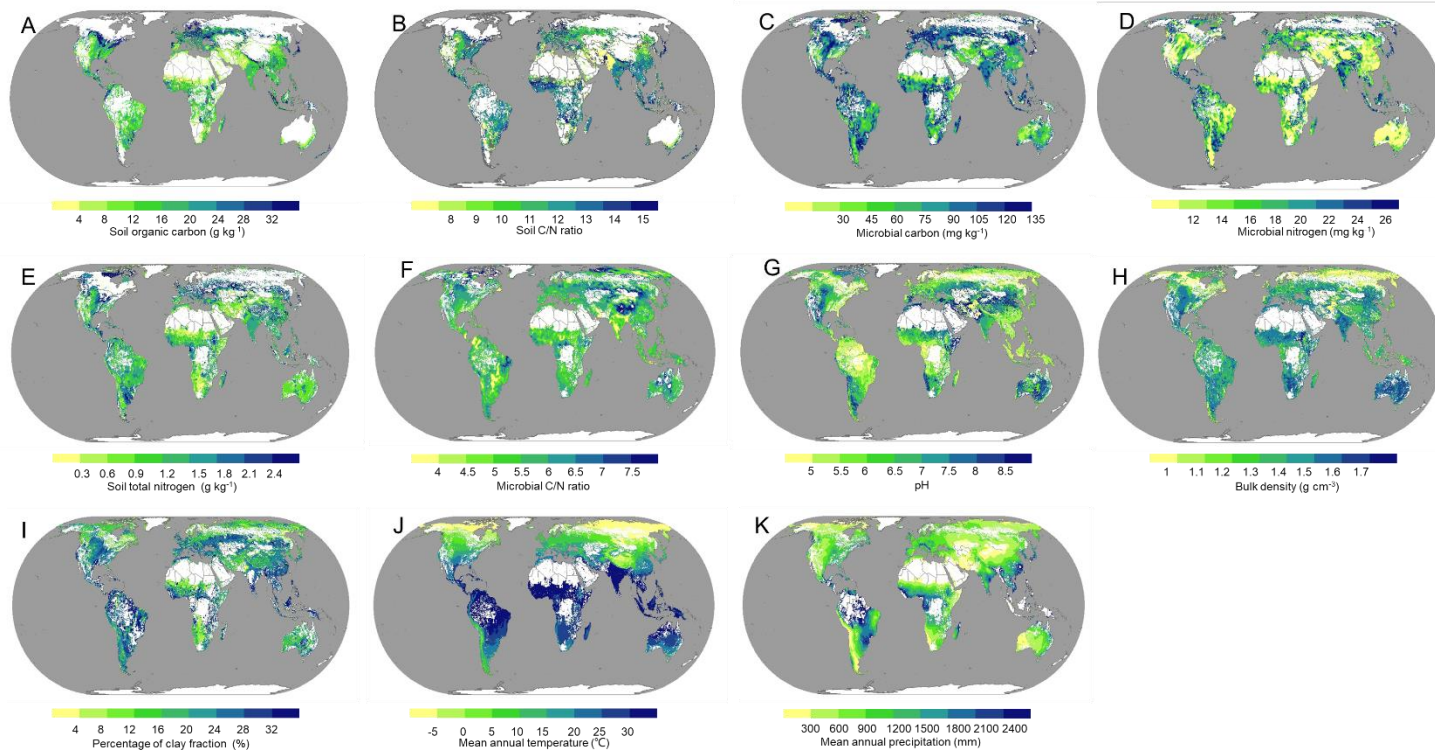

**Fig. S3** Grassland: Global grid-level soil organic carbon (A), soil C/N ratio (B), microbial carbon (C), microbial nitrogen (D), soil total nitrogen (E), microbial C/N ratio (F), pH (G), bulk density (H), percentage of clay fraction (I), mean annual temperature (J), mean annual precipitation (K).

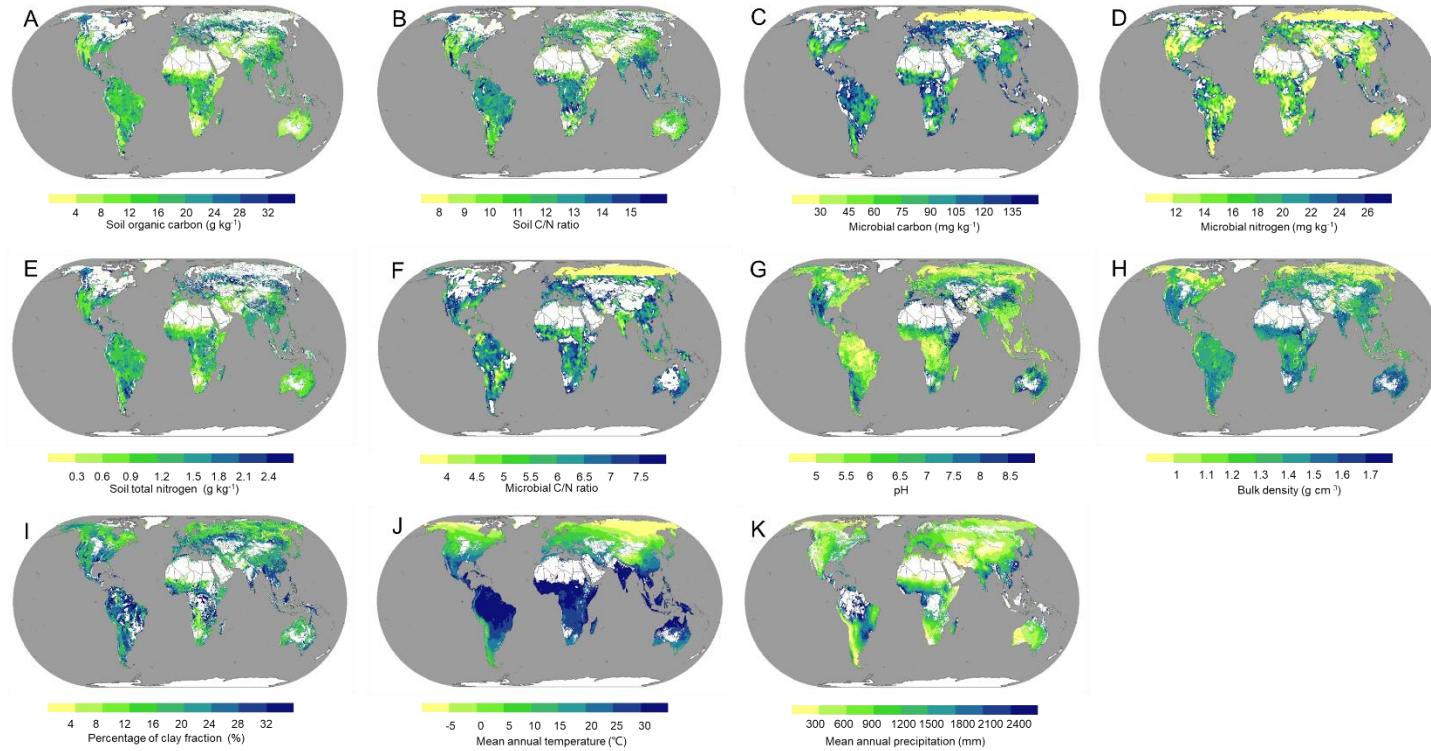

**Fig. S4** Forestland: Global grid-level soil organic carbon (A), soil C/N ratio (B), microbial carbon (C), microbial nitrogen (D), soil total nitrogen (E), microbial C/N ratio (F), pH (G), bulk density (H), percentage of clay fraction (I), mean annual temperature (J), mean annual precipitation (K).

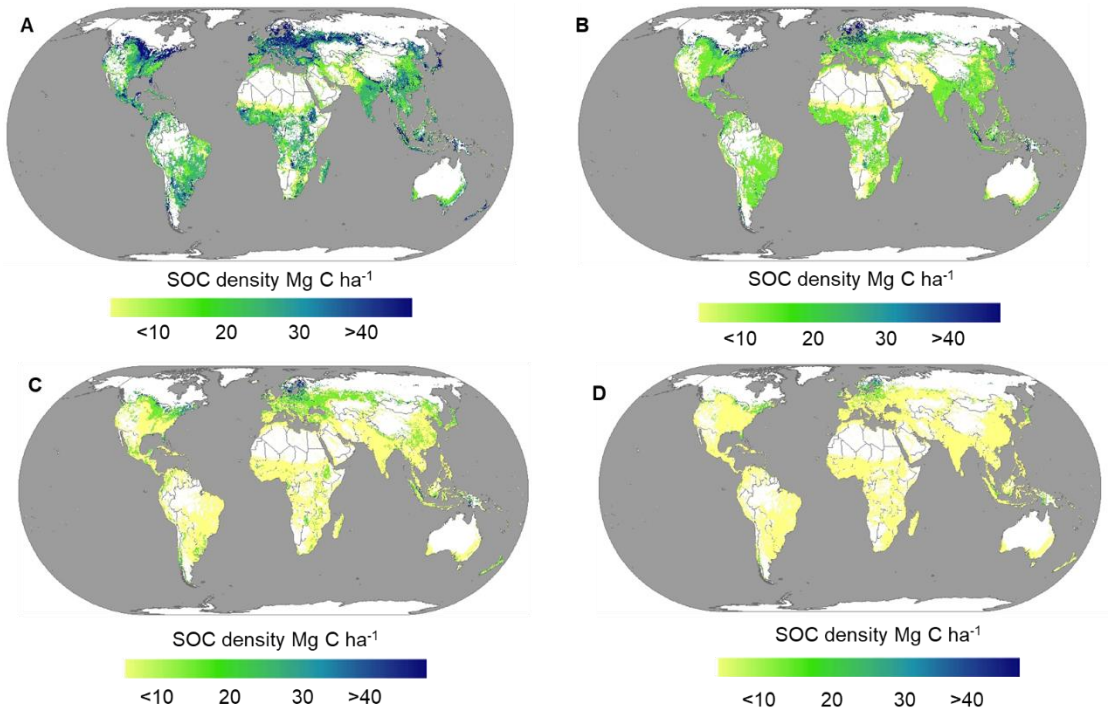

**Figure S5.** Grid-level maps showing the predicted global soil profiles SOC density of the cropland. A, B, C and D represents the 20–40 cm, 40–60 cm, 60–80 cm, 80–100 cm layer, respectively.

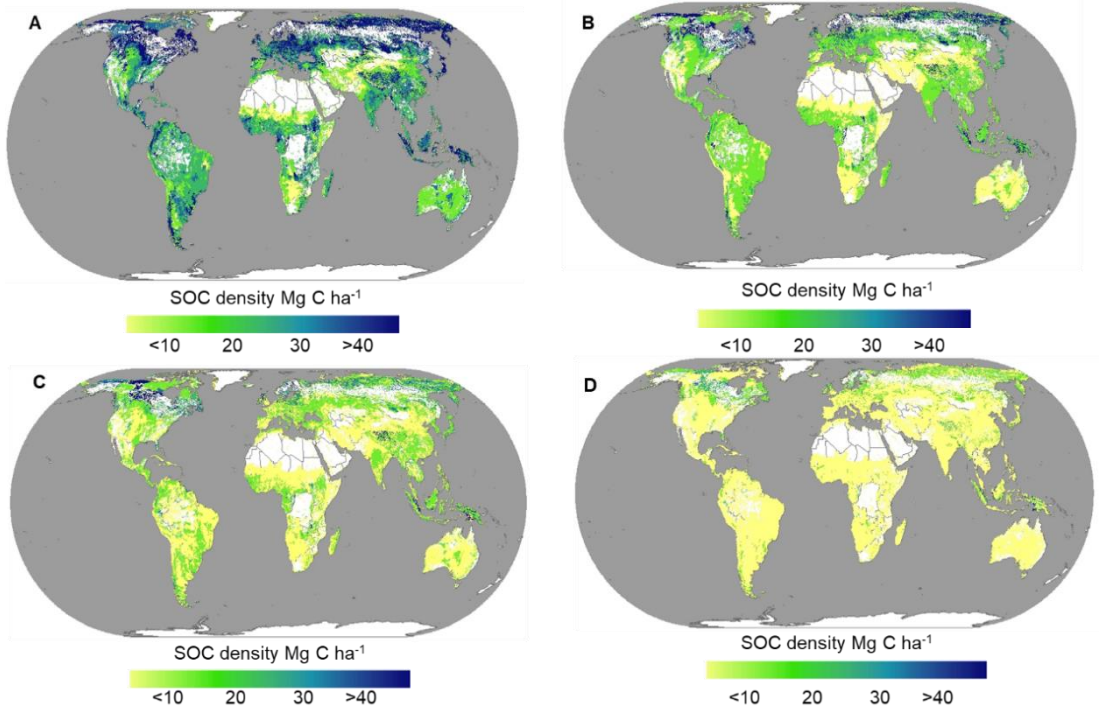

**Figure S6.** Grid-level maps showing the predicted global soil profiles SOC density of the grassland. A, B, C and D represents the 20–40 cm, 40–60 cm, 60–80cm, 80–100cm layer, respectively.

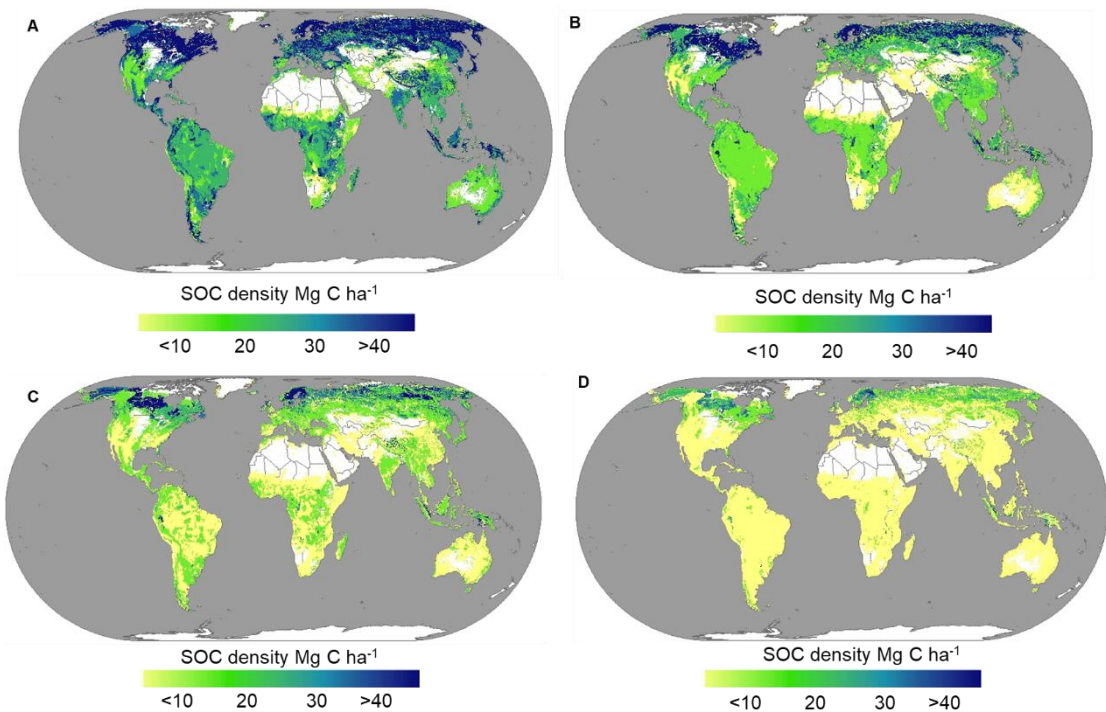

**Figure S7.** Grid-level maps showing the predicted global soil profiles SOC density of the forestland. A, B, C and D represents the 20–40 cm, 40–60 cm, 60–80cm, 80–100cm layer, respectively.



Table S1. Comparisons of estimated SOC density with other studies

|                        | Topsoil (Mg ha <sup>-1</sup> )<br>0-30 (0-20)<br>(cm) | Subsoil (Mg ha <sup>-1</sup> )<br>30-100 (20-100)<br>(cm) | Total (Mg ha <sup>-1</sup> )<br>0-100<br>(cm) | References               |
|------------------------|-------------------------------------------------------|-----------------------------------------------------------|-----------------------------------------------|--------------------------|
| Cropland               | 41                                                    | 48                                                        | 89                                            | Liu et al., 2021         |
| Tropical<br>cropland   | 85                                                    | 184                                                       | 269                                           | Reichenbach et al., 2023 |
| Paddy                  | 51                                                    | 57                                                        | 108                                           | Liu et al., 2021         |
| Cropland               | 54.6                                                  | 63.8                                                      | 118.4                                         | This study               |
| Forestland             | 87                                                    | 102                                                       | 189                                           | Dixon et al., 1994       |
| Tropical<br>forestland | 91                                                    | 189                                                       | 280                                           | Reichenbach et al., 2023 |
| Mangrove               | 130                                                   | 153                                                       | 283                                           | Atwood et al., 2017      |
| Forestland             | 80.2                                                  | 100.4                                                     | 180.6                                         | This study               |
| Grassland              | 38                                                    | 44                                                        | 82                                            | Conant et al., 2017      |
| Grassland              | 70.4                                                  | 83.3                                                      | 153.7                                         | This study               |
| All land               | 45                                                    | 53                                                        | 98                                            | Hiederer et al., 2011    |
| All land               | 68.4                                                  | 82.5                                                      | 150.9                                         | This study               |
